# Supplementary material for: Gut microbiota of liver transplantation recipients
Source: PubMed Central journal article supplement (PMC5476624; doi:10.1038/s41598-017-03476-4), 2017-06-19
Supplement: 41598_2017_3476_MOESM1_ESM.pdf [file 41598_2017_3476_MOESM1_ESM.pdf]

## Gut microbiota of liver transplantation recipients

Li-Ying Sun<sup>1</sup>, Yun-Sheng Yang<sup>2\*</sup>, Wei Qu<sup>1</sup>, Zhi-Jun Zhu<sup>1</sup>, Lin Wei<sup>1</sup>,  
Zhi-sheng Ye<sup>3</sup>, Jian-rui Zhang<sup>1</sup>, Xiao-ye Sun<sup>4</sup>, Zhi-Gui Zeng<sup>1</sup>

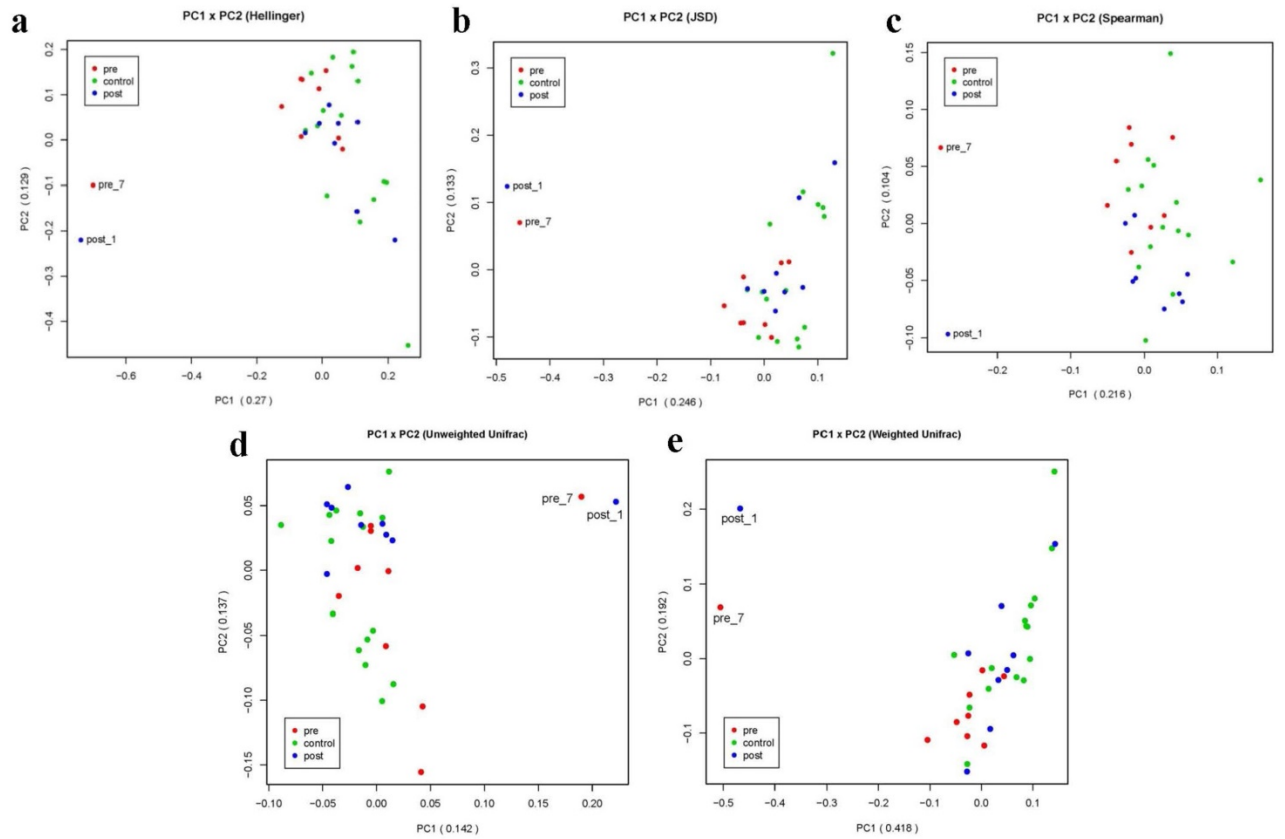

Supplementary Fig. 1 a) PCoA analysis based on Hellinger distance. b) PCoA analysis based on JSD distance. c) PCoA analysis based on Spearman Coefficient Distance. d) PCoA Based on Unweighted Unifrac distance. e) PCoA analysis based on weighted unifrac analysis.

**a**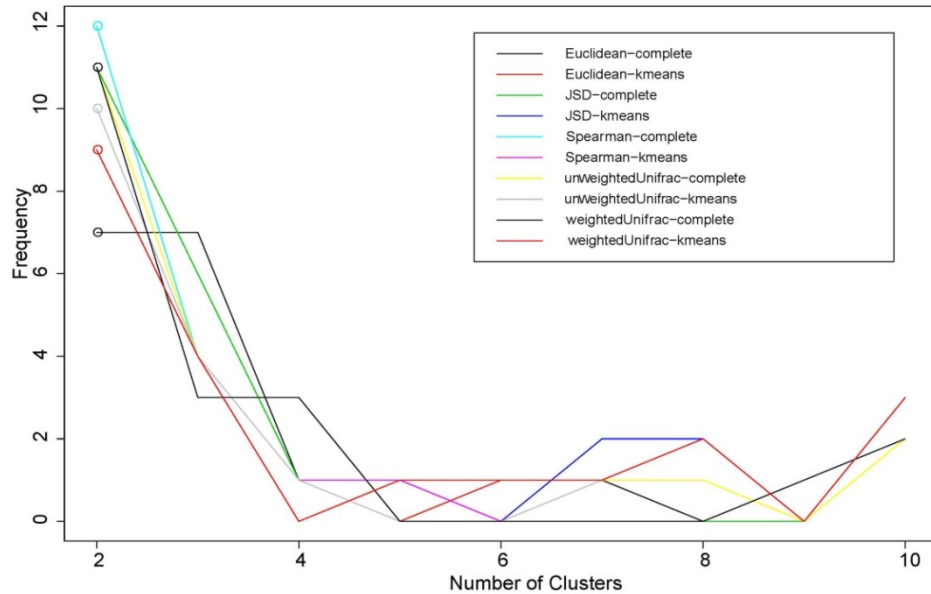**b**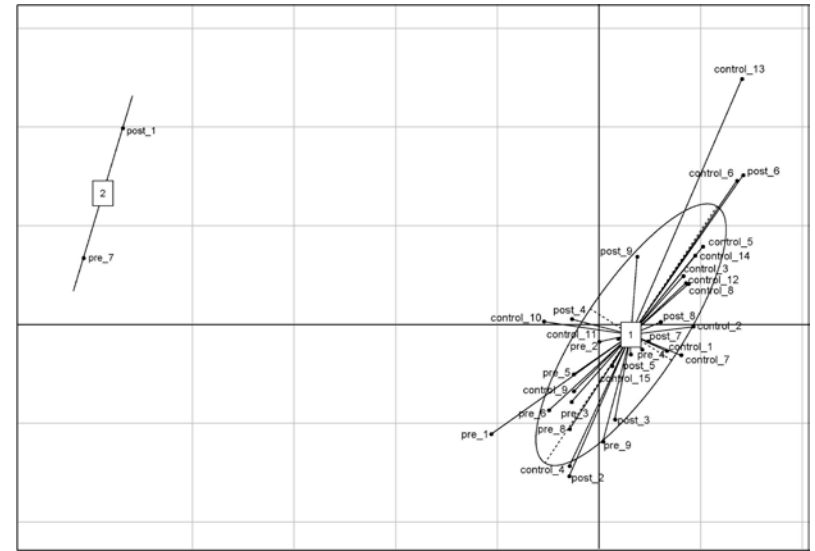

**Supplementary Fig.2** a) Cluster frequency diagram under different clust indices and distances: the optimistic number of cluster was 2 according a major-rule; b) PcoA analysis of all samples based on weighted unifrac distance and K-means clustering method, pre-7 and post-1 were binned into a discrete cluster then identified as outliers.

**a**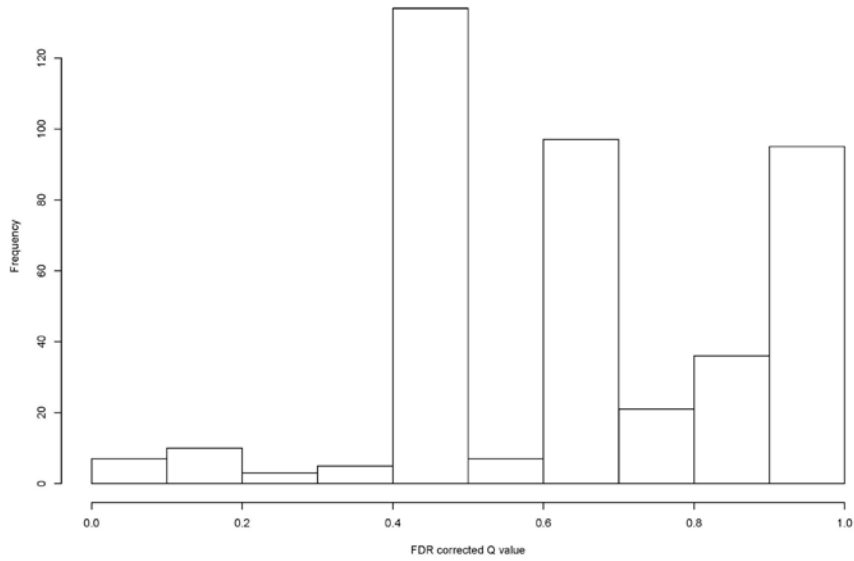**b**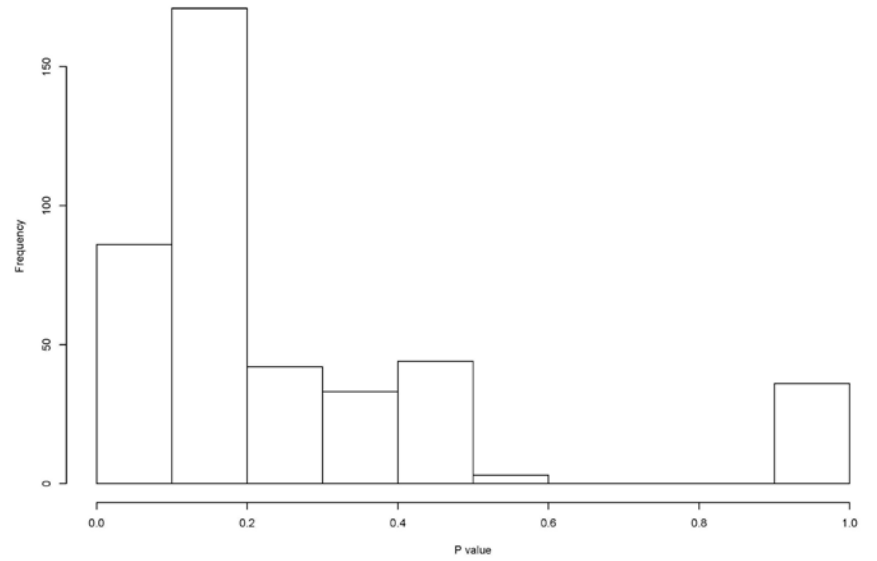

**Supplementary Fig.3** Histogram of P values calculated by hypothesis tests based on 7 paired samples. a) FDR corrected q values by multiple testing. b) treated-naive P values.

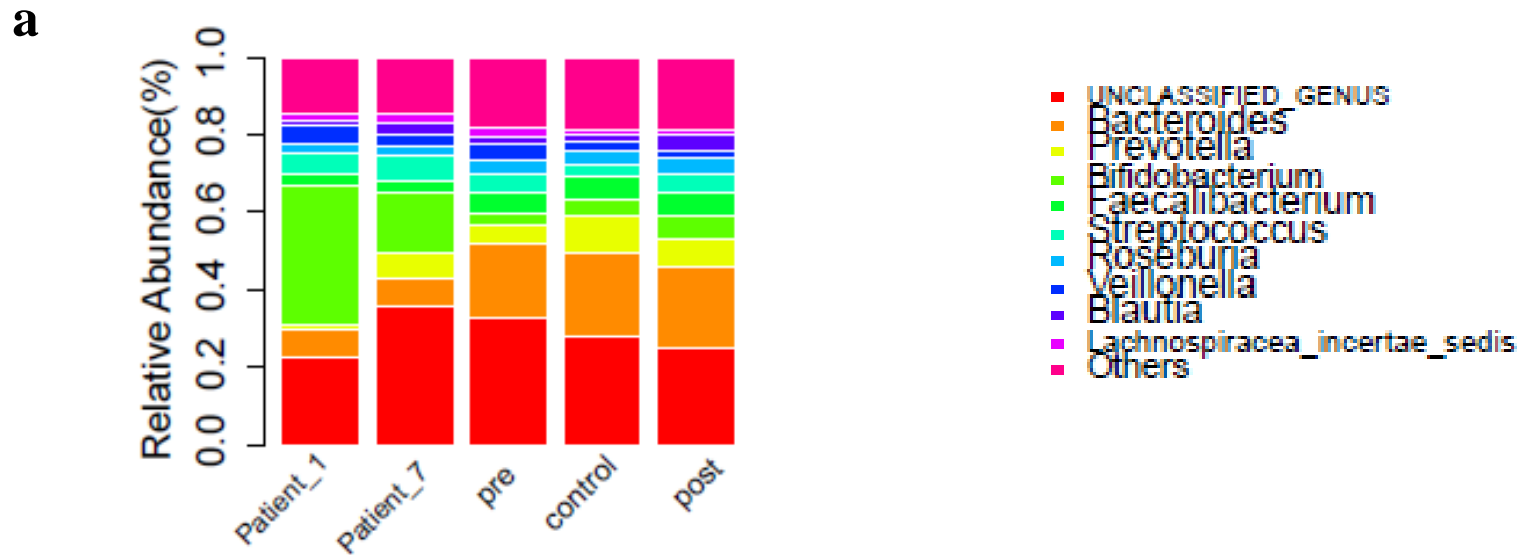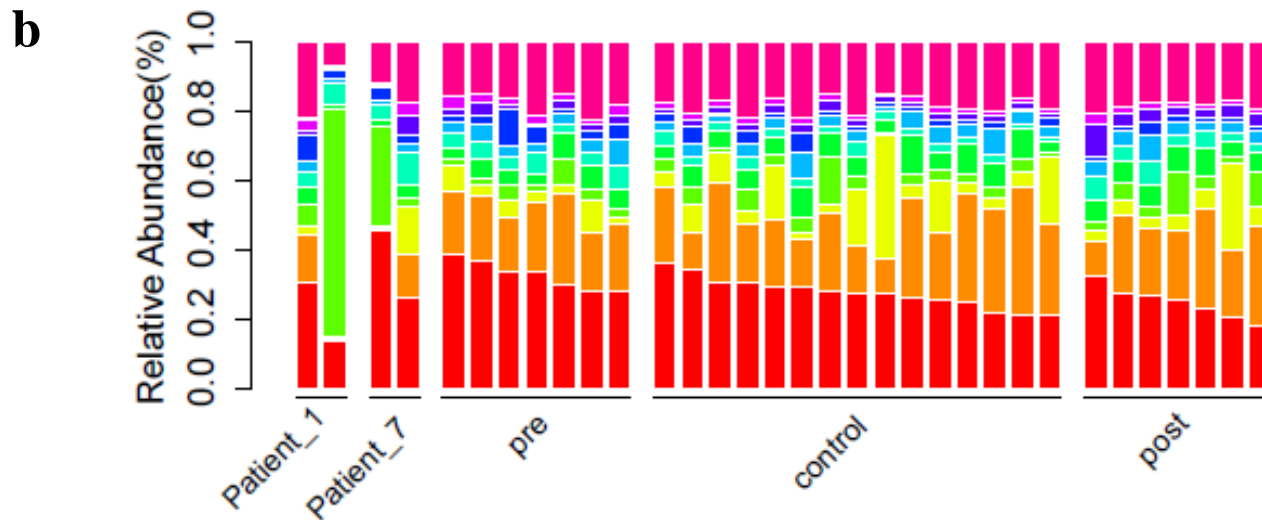

**Supplementary Fig.4** Barplot of all microbiota at genus level . a) Mean relative abundance of all cohort. b) Relative abundance of all samples.

**Table S1 Characteristics of Patients in Study**

| Case | Gender | Age  | BMI  | Diagnosis                                                    | MELD |
|------|--------|------|------|--------------------------------------------------------------|------|
| 1    | male   | 54   | 23.4 | HBV-related cirrhosis,HCC                                    | 23   |
| 2    | male   | 53   | 22.1 | HBV-related cirrhosis,HCC                                    | 28   |
| 3    | male   | 52.3 | 26.8 | HBV-related cirrhosis,HCC                                    | 19   |
| 4    | male   | 51   | 21.5 | Decompensated alcoholic cirrhosis                            | 16   |
| 5    | male   | 64   | 26.3 | Decompensated alcoholic cirrhosis                            | 22   |
| 6    | male   | 18   | 17.6 | Decompensated cirrhosis,Portal vein cavernous transformation | 18   |
| 7    | male   | 65.3 | 22.7 | HBV-related cirrhosis                                        | 16   |
| 8    | male   | 40   | 25.5 | HBV-related cirrhosis,HCC                                    | 12   |
| 9    | male   | 48   | 24.8 | HBV-related cirrhosis,HCC                                    | 10   |

**Table S2 Clinical data of study population before LT**

|   | Cirrhosis complications of pre-LT |                           |                        |                 | LT indication                 | Past medical history |
|---|-----------------------------------|---------------------------|------------------------|-----------------|-------------------------------|----------------------|
|   | Refractory ascites                | Gastrointestinal bleeding | hepatic encephalopathy | malignant tumor |                               |                      |
| 1 | No                                | No                        | No                     | Yes             | liver cirrhosis and HCC       | No                   |
| 2 | No                                | No                        | No                     | Yes             | liver cirrhosis and HCC       | TACE                 |
| 3 | Yes                               | No                        | Yes                    | Yes             | liver cirrhosis and HCC       | TACE                 |
| 4 | No                                | No                        | No                     | Yes             | liver cirrhosis and HCC       | No                   |
| 5 | Yes                               | No                        | No                     | No              | Decompensated liver cirrhosis | No                   |
| 6 | No                                | No                        | No                     | No              | Decompensated liver cirrhosis | No                   |
| 7 | Yes                               | Yes                       | No                     | No              | Decompensated liver cirrhosis | No                   |
| 8 | No                                | Yes                       | No                     | No              | Decompensated liver cirrhosis | Cholecystectomy      |
| 9 | No                                | No                        | No                     | Yes             | liver cirrhosis and HCC       | TACE                 |

**Table S3 Peri-operative complications of study population**

|   | Hypertension      | Hyperglycaemia   | Biliary complication             | Bleeding                                                 | Infection                            |
|---|-------------------|------------------|----------------------------------|----------------------------------------------------------|--------------------------------------|
| 1 | No                | No               | No                               | No                                                       | Pneumonia , Healing<br>after 10 days |
| 2 | No                | No               | Biliary anastomotic<br>stricture | No                                                       | No                                   |
| 3 | No                | No               | No                               | Yes, the second day post-LT,<br>hemostasis was performed | No                                   |
| 4 | No                | Yes, use Insulin | Biliary anastomotic<br>stricture | No                                                       | No                                   |
| 5 | No                | No               | No                               | No                                                       | No                                   |
| 6 | Yes, take Norvasc | No               | No                               | No                                                       | No                                   |
| 7 | No                | No               | Slight bile leakage              | No                                                       | No                                   |
| 8 | Yes, take Norvasc | No               | No                               | No                                                       | No                                   |
| 9 | No                | No               | No                               | No                                                       | No                                   |

**Table S4 Characteristics of controls in Study**

| <b>Control</b> | <b>Gender</b> | <b>Age(year)</b> | <b>Height(cm)</b> | <b>Body weight(Kg)</b> | <b>BMI</b> |
|----------------|---------------|------------------|-------------------|------------------------|------------|
| control_1      | male          | 49               | 170               | 66                     | 22.8       |
| control_2      | male          | 46               | 176               | 72                     | 23.2       |
| control_3      | male          | 54               | 170               | 71                     | 24.6       |
| control_4      | male          | 48               | 177               | 74                     | 23.6       |
| control_5      | female        | 50               | 161               | 61                     | 23.5       |
| control_6      | male          | 49               | 172               | 71                     | 24.0       |
| control_7      | male          | 47               | 178               | 79                     | 24.9       |
| control_8      | female        | 46               | 163               | 62                     | 23.3       |
| control_9      | male          | 46               | 177               | 74                     | 23.6       |
| control_10     | female        | 44               | 160               | 55                     | 21.5       |
| control_11     | male          | 59               | 180               | 80                     | 24.7       |
| control_12     | male          | 42               | 170               | 68                     | 23.5       |
| control_13     | male          | 44               | 173               | 69                     | 23.1       |
| control_14     | male          | 47               | 170               | 66                     | 22.8       |
| control_15     | female        | 49               | 158               | 59                     | 23.6       |



**Table S5 Comparison of healthy controls with patients in Age & BMI & Sex**

|          | <b>sex(F=female,M=male)</b> | <b>Age(mean/sd)</b> | <b>bmi(mean/sd)</b> |
|----------|-----------------------------|---------------------|---------------------|
| Patient  | F=0,M=9                     | 49.5/4.19           | 23.5/0.85           |
| Control  | F=4,M=11                    | 48/14.08            | 23.41/2.87          |
| Pvalue 1 | 0.2589                      | 0.1691              | 1                   |
| Pvalue 2 | 0.2579                      | 0.7611              | 0.9193              |

Pvalue1: Fisher's exact test(Sex), wilcoxn rank sum test(Age/BMI)

Pvalue2: Chi square test(Sex), student's t test(Age/BMI)

**Table S6**

|                         | <b>WeightedUnifrac</b> | <b>UnweightedUnifrac</b> | <b>JSD</b> | <b>Spearman</b> |
|-------------------------|------------------------|--------------------------|------------|-----------------|
| P value (sex)           | 0.375                  | 0.487                    | 0.308      | 0.2             |
| P value (age)           | 0.161                  | 0.506                    | 0.293      | 0.13            |
| P value (bmi)           | 0.071                  | 0.067                    | 0.215      | 0.224           |
| P value (Cohort)        | 0.004                  | 0.845                    | 0.019      | 0.353           |
| Sum of Square(Residual) | 0.6324                 | 0.47698                  | 1.21051    | 0.54268         |

**Table S7 Pyrosequencing Data of Each Sample in Study**

| <b>Sample</b> | <b>Available_reads</b> | <b>Random_chose_reads</b> | <b>OTU(all)</b> | <b>Shannon_index</b> | <b>OUT</b> | <b>chao1</b> |
|---------------|------------------------|---------------------------|-----------------|----------------------|------------|--------------|
| pre_1         | 62025                  | 10000                     | 625             | 4.25                 | 321        | 403.51       |
| pre_2         | 55026                  | 10000                     | 591             | 4.32                 | 304        | 366.13       |
| pre_3         | 28377                  | 10000                     | 463             | 3.94                 | 286        | 354.12       |
| pre_4         | 31039                  | 10000                     | 520             | 4.52                 | 339        | 407.76       |
| pre_5         | 57307                  | 10000                     | 575             | 4.00                 | 291        | 365.06       |
| pre_6         | 46524                  | 10000                     | 574             | 4.20                 | 335        | 425.01       |
| pre_7         | 50406                  | 10000                     | 513             | 2.44                 | 254        | 408.51       |
| pre_8         | 39244                  | 10000                     | 529             | 4.29                 | 307        | 379.00       |
| pre_9         | 44660                  | 10000                     | 565             | 4.46                 | 322        | 418.49       |
| control_1     | 79899                  | 10000                     | 583             | 4.01                 | 289        | 393.90       |
| control_2     | 46168                  | 10000                     | 507             | 4.07                 | 270        | 338.12       |
| control_3     | 50422                  | 10000                     | 586             | 4.40                 | 309        | 367.68       |
| control_4     | 56930                  | 10000                     | 563             | 4.49                 | 315        | 385.05       |
| control_5     | 15414                  | 10000                     | 404             | 4.08                 | 289        | 367.77       |
| control_6     | 23069                  | 10000                     | 494             | 4.15                 | 319        | 409.05       |
| control_7     | 15251                  | 10000                     | 415             | 4.41                 | 313        | 424.11       |
| control_8     | 50085                  | 10000                     | 524             | 4.26                 | 293        | 369.24       |
| control_9     | 39353                  | 10000                     | 592             | 4.55                 | 349        | 469.13       |
| control_10    | 46680                  | 10000                     | 588             | 4.28                 | 327        | 399.43       |
| control_11    | 18221                  | 10000                     | 434             | 4.19                 | 312        | 392.12       |
| control_12    | 27939                  | 10000                     | 515             | 4.39                 | 322        | 388.22       |
| control_13    | 19515                  | 10000                     | 421             | 3.56                 | 291        | 356.19       |
| control_14    | 40539                  | 10000                     | 564             | 4.23                 | 311        | 383.12       |
| control_15    | 32605                  | 10000                     | 533             | 4.41                 | 330        | 380.00       |
| post_1        | 45019                  | 10000                     | 470             | 1.82                 | 241        | 358.56       |
| post_2        | 29348                  | 10000                     | 526             | 4.47                 | 324        | 389.19       |
| post_3        | 28375                  | 10000                     | 532             | 4.45                 | 326        | 414.47       |
| post_4        | 18782                  | 10000                     | 453             | 4.31                 | 318        | 396.05       |
| post_5        | 34056                  | 10000                     | 579             | 4.47                 | 326        | 400.42       |

|        |       |       |     |      |     |        |
|--------|-------|-------|-----|------|-----|--------|
| post_6 | 21013 | 10000 | 465 | 4.12 | 317 | 421.02 |
| post_7 | 36011 | 10000 | 533 | 4.33 | 318 | 412.56 |
| post_8 | 54353 | 10000 | 574 | 4.30 | 323 | 426.51 |
| post_9 | 37984 | 10000 | 505 | 4.25 | 312 | 375.22 |

---

**Table S8**

|                           | <b>pre vs control</b> |            |            | <b>control vs post</b> |            |            |
|---------------------------|-----------------------|------------|------------|------------------------|------------|------------|
|                           | <b>PC1</b>            | <b>PC2</b> | <b>PC3</b> | <b>PC1</b>             | <b>PC2</b> | <b>PC3</b> |
| <b>JSD</b>                | 0.1333                | 0.1842     | 0.1661     | 0.4726                 | 0.0193     | 0.3398     |
| <b>Hellinger</b>          | 0.105                 | 0.1842     | 0.1842     | 0.4453                 | 0.0193     | 0.3149     |
| <b>Spearman</b>           | 0.0193                | 0.3654     | 0.1333     | 0.0926                 | 0.0069     | 0.0033     |
| <b>weighted Unifrac</b>   | 0.0213                | 0.0465     | 0.4902     | 0.2982                 | 0.8907     | 0.2101     |
| <b>unweighted unifrac</b> | 0.2101                | 0.5815     | 0.6796     | 0.2372                 | 0.0038     | 0.9452     |
